# Supplementary material for: Involvement of budding yeast Rad5 in translesion DNA synthesis through physical interaction with Rev1
Source: PubMed Central journal article supplement — Nucleic Acids Res. 2016 Mar 21;44(11):5231–45. doi: 10.1093/nar/gkw183 (PMC4914093; doi:10.1093/nar/gkw183), 2016-03-21
Supplement: supp_gkw183_nar-00310-d-2016-File010.pdf [file supp_gkw183_nar-00310-d-2016-File010.pdf]

## Supplementary materials

**Table S1** *Saccharomyces* strains used in this study

| Strain               | Genotype                                                                                                | Source         |
|----------------------|---------------------------------------------------------------------------------------------------------|----------------|
| BY4741               | <i>MATa his3Δ1 leu2Δ0 met15Δ0 ura3Δ0</i>                                                                | SGD Consortium |
| BY4741 <i>trp1Δ</i>  | BY4741 with <i>trp1Δ::Kan<sup>R</sup></i>                                                               | SGD Consortium |
| BY4741 <i>rad5Δ</i>  | BY4741 with <i>rad5Δ::Kan<sup>R</sup></i>                                                               | SGD Consortium |
| BY4741 <i>rev1Δ</i>  | BY4741 with <i>rev1Δ::Kan<sup>R</sup></i>                                                               | SGD Consortium |
| BY4741 <i>mms2Δ</i>  | BY4741 with <i>mms2Δ::Kan<sup>R</sup></i>                                                               | SGD Consortium |
| BY4741 <i>ubc13Δ</i> | BY4741 with <i>ubc13Δ::Kan<sup>R</sup></i>                                                              | SGD Consortium |
| WXY1634              | BY4741 with <i>mms2Δ::Kan<sup>R</sup> rev1Δ::NAT<sup>R</sup></i>                                        | Lab stock      |
| WXY1810              | BY4741 with <i>ubc13Δ::Kan<sup>R</sup> rev1Δ::NAT<sup>R</sup></i>                                       | Lab stock      |
| WXY1912              | BY4741 with <i>rev1Δ::Kan<sup>R</sup> rad5Δ::NAT<sup>R</sup></i>                                        | Lab stock      |
| HK578-10D            | <i>MATα ade2-1 can1-100 his3-11,15 leu2-3,112 trp1-1 ura3-1</i>                                         | H. Klein       |
| WXY902               | HK578-10D <i>mms2Δ::HIS3</i>                                                                            | Lab stock      |
| WXY904               | HK578-10D <i>ubc13Δ::HIS3</i>                                                                           | Lab stock      |
| HK578-6B             | HK578-10D <i>rad5Δ::hisG-URA3-hisG</i>                                                                  | H. Klein       |
| WXY922               | HK578-10D <i>ubc13Δ::HIS3 rad5Δ::hisG-URA3-hisG</i>                                                     | Lab stock      |
| WXY3138              | HK578-10D <i>mms2Δ::HIS3 rad5Δ::hisG-URA3-hisG</i>                                                      | Lab stock      |
| WXY3157              | HK578-10D <i>rad5Δ::hisG-URA3-hisG rev1Δ::NAT<sup>R</sup></i>                                           | This study     |
| WXY2936              | HK578-10A <i>rev1Δ::HIS3</i>                                                                            | Lab stock      |
| DBY747               | <i>MATa his3-Δ1 leu2-3,112 trp1-289 ura3-52</i>                                                         | D. Botstein    |
| WXY717               | DBY747 <i>rev1Δ::LEU2</i>                                                                               | Lab stock      |
| WXY731               | DBY747 <i>rad5Δ::hisG-URA3-hisG</i>                                                                     | Lab stock      |
| WXY3163              | DBY747 <i>rad5-FN13,14AA</i>                                                                            | This study     |
| WXY2974              | DBY747 <i>rad5-I916A</i>                                                                                | Lab stock      |
| WXY3164              | DBY747 <i>rad5-FN13,14AA I916A</i>                                                                      | This study     |
| PJ69-4a              | <i>MATa trp1-901 leu2-3,112 ura3-52 his3-200 gal4Δ gal80Δ Met2::GAL7-lacZ LYS2::GAL1-HIS3 GAL2-ADE2</i> | P. James       |

**Table S2.** Oligonucleotides used in this study

| Name           | Sequence                                                       |
|----------------|----------------------------------------------------------------|
| pM-rad556F     | GGATCCATGAGTCATATTGCAGCGGAAGAAAGGAAGAGGTTT                     |
| pM-rad556R     | AAACCTCTTCCTTTCTTCCGCTGCAATATGACTCATGGATCC                     |
| pM-rad578F     | ATGAGTCATATTGAACAGGCAGCAAGGAAGAGGTTTTTTAAC                     |
| pM-rad578R     | GTAAAAAACCTCTTCCTTGCTGCCTGTTCAATATGACTCAT                      |
| pM-rad5910F    | CATATTGAACAGGAAGAAGCGGCGAGGTTTTTTAACGATGAC                     |
| pM-rad5910R    | GTCATCGTTAAAAAACCTCGCCGCTTCTTCCTGTTCAATATG                     |
| pM-rad51314F   | GAAGAAAGGAAGAGGTTTGCTGCCGATGACCTTGACACTTCA                     |
| pM-rad51314R   | TGAAGTGTCAAGGTCATCGGCAGCAAACCTCTTCCTTTCTTC                     |
| pM-rad51516F   | AGGAAGAGGTTTTTTAACGCTGCCCTTGACACTTCAGAAACA                     |
| pM-rad51516R   | TGTTTCTGAAGTGTCAAGGGCAGCGTTAAAAAACCTCTTCCT                     |
| pM-rad52426F   | GACACTTCAGAAACATCGGCAAACGCCAAATCTGAGAATAAA<br>GAG              |
| pM-rad52426R   | CTCTTTATTCTCAGATTTGGCGTTTGCCGATGTTTCTGAAGTGT<br>C              |
| pM-rad52829F   | ACATCGTTAAACTTCAAAGCTGCGAATAAAGAGTCGTTTTTA                     |
| pM-rad52829R   | TAAAAACGACTCTTTATTCGCAGCTTTGAAGTTAACGATGT                      |
| pM-rad5R11AF   | GAACAGGAAGAAAGGAAGGCGTTTTTTAACGATGACCTT                        |
| pM-rad5R11AR   | AAGGTCATCGTTAAAAAACGCCTTCCTTTCTTCCTGTTC                        |
| pM-rad5F12AF   | CAGGAAGAAAGGAAGAGGGCTTTAACGATGACCTTGAC                         |
| pM-rad5F12AR   | GTCAAGGTCATCGTTAAAAGCCCTTCCTTTCTTCCTG                          |
| pM-rad5F13AF   | GAAGAAAGGAAGAGGTTTGCTAACGATGACCTTGACACT                        |
| pM-rad5F13AR   | AGTGTCAAGGTCATCGTTAGCAAACCTTCCTTTCTTC                          |
| pM-rad5N14AF   | GAAAGGAAGAGGTTTTTTGCCGATGACCTTGACACTTCA                        |
| pM-rad5N14AR   | TGAAGTGTCAAGGTCATCGGCAAAAAACCTCTTCCTTTC                        |
| pTRad5N21-30F  | GATGACCTTGACACTTCAAAGAGTCGTTTTTATTT                            |
| pTRad5N21-30R  | AAATAAAAACGACTCTTTTGAAGTGTCAAGGTCATC                           |
| pRad5NT30Stu1F | CCTTAGAAACACACCTAAAGTCTTACAGTATCACAATATGAA<br>AGAGTCGTTTTTATTT |
| pRad5NT60Stu1F | CCTTAGAAACACACCTAAAGTCTTACAGTATCACAATATGCG<br>ATCTATTGTGCCAGTC |
| pRad5SalR      | GAACTTGTCGACTAATTGGTAGTTTCTTGACC                               |

**Table S3** Data collection, phasing and refinement statistics

|                                        | Crystal 1 -native       | Crystal 2 -native       | Crystal 3 -Hg           |
|----------------------------------------|-------------------------|-------------------------|-------------------------|
| <b>Data collection</b>                 |                         |                         |                         |
| Space group                            | P1 21 1                 | P21 21 2                | P21 21 2                |
| Cell dimensions                        |                         |                         |                         |
| <i>a, b, c</i> (Å)                     | 58.589, 49.280, 103.074 | 103.125, 49.370, 58.654 | 102.767, 49.114, 57.802 |
| $\alpha, \beta, \gamma$ (°)            | 90.000, 92.197, 90.000  | 90.000, 90.000, 90.000  | 90.000, 90.000, 90.000  |
| Wavelength (Å)                         | 0.97911                 | 0.97911                 | 1.00880                 |
| Resolution (Å)                         | 30-2.0                  | 40-2.04                 | 50-2.4                  |
|                                        | (2.07-2.00) *           | (2.11-2.04)             | (2.49-2.4)              |
| $R_{\text{sym}}$ or $R_{\text{merge}}$ | 0.086 (0.184)           | 0.139 (0.626)           | 0.125 (0.408)           |
| $I / \sigma I$                         | 16 (6.2)                | 30 (3.0)                | 24.7 (4.8)              |
| Completeness (%)                       | 95.7 (89.4)             | 99.1 (96.6)             | 99.5 (26.3)             |
| Redundancy                             | 3.0 (2.7)               | 5.3 (5.2)               | 10.8 (9.8)              |
| <b>Refinement</b>                      |                         |                         |                         |
| Resolution (Å)                         | 29-2.0                  |                         |                         |
| No. reflections                        | 38367                   |                         |                         |
| $R_{\text{work}} / R_{\text{free}}$    | 20.1/24.6               |                         |                         |
| No. atoms                              |                         |                         |                         |
| Protein                                | 4071                    |                         |                         |
| Ligand/ion                             | /                       |                         |                         |
| Water                                  | 156                     |                         |                         |
| $B$ -factors (Å <sup>2</sup> )         |                         |                         |                         |
| Protein                                | 28                      |                         |                         |
| Ligand/ion                             | /                       |                         |                         |
| Water                                  | 30                      |                         |                         |
| R.m.s deviations                       |                         |                         |                         |
| Bond lengths (Å)                       | 0.011                   |                         |                         |
| Bond angles (°)                        | 1.201                   |                         |                         |

\*Values in parentheses are for highest-resolution shell.

## Supplementary Figures

**Figure S1.** Physical interaction between Rad5 and Rev1 by yeast two-hybrid assays. **(A)** Interaction of full-length Rad5 and Rev1. **(B)** Interaction of truncated Rad5 with full-length Rev1. The Y2H conditions are as described in Figure 1.

**Figure S2.** Complementation of the yeast *rad5* null mutant by N-terminally truncated Rad5. **(A)** Complementation of the yeast *rad5* null mutant by N-terminally truncated Rad5. **(B)** Complementation of the yeast *rad5 ubc13* null mutant by N-terminally truncated Rad5. Experimental conditions are as described in Figure 3.

**Figure S3.** Crystal structures of the Rev1-CTD and Rad5-NTD complex. **(A)** Superimposition of the four copies of the Rev1-Rad5 complex in one AU in the crystals, which show similar Rev1-Rad5 interactions. The four copies of Rev1 are colored blue, grey, orange and magenta. Their contacting Rad5 are colored green, red, cyan and yellow, respectively. Due to crystal packing interactions, the N-terminal end of Rad5 and the C-terminal  $\alpha 5$  of Rev1 adopt different conformations among the four copies of the complex in one AU. **(B)** Superimpose of the 2Fo-Fc electron density map around the Rad5 peptide (contour level  $\sigma=1$ ) with the refined model.

**Figure S4.** Rad5-NTD RFF mutations only affect the TLS activity. **(A)** A Y2H assay of Rad5 and its RFF mutations with Ubc13. The Y2H conditions are as described in Figure 1. **(B)** Functional complementation of the *rad5* $\Delta$  mutant by *rad5-RFF* mutant alleles by a gradient plate assay.

**Figure S5.** The *rad5-F13A* mutation does not affect expression and its product interaction with

Pol30. **(A)** The *rad5-F13A* mutation does not affect its product interaction with Pol30. The Y2H experimental conditions are as described in Figure 1. **(B)** The *rad5-F13A* mutation does not affect its protein level. Lane 1, molecular weight markers; Lane 2, the pGAD424 vector transformant; Lane 3, the pGAD-Rad5 transformant; and Lane 4, the pGAD-Rad5-F13A transformant. The host strain is PJ69-4a.

A

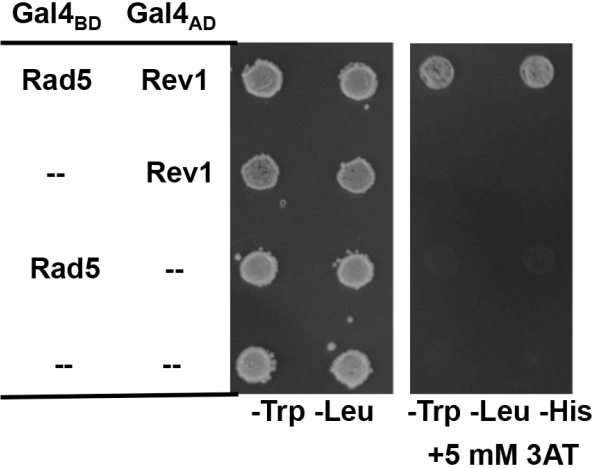

B

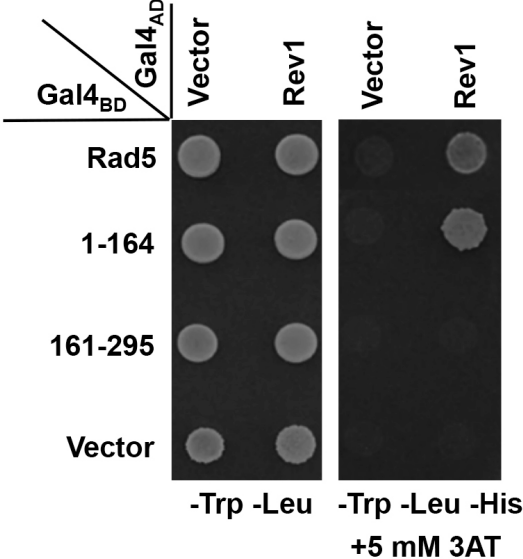

Figure S1

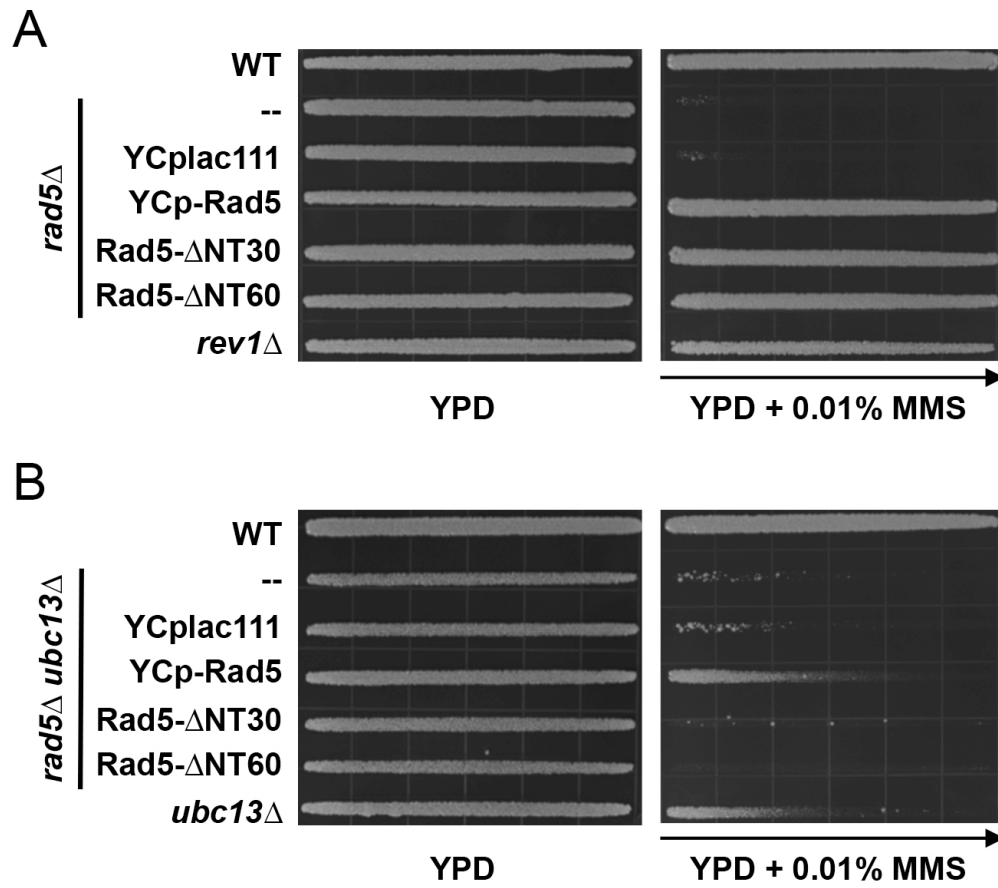

Figure S2

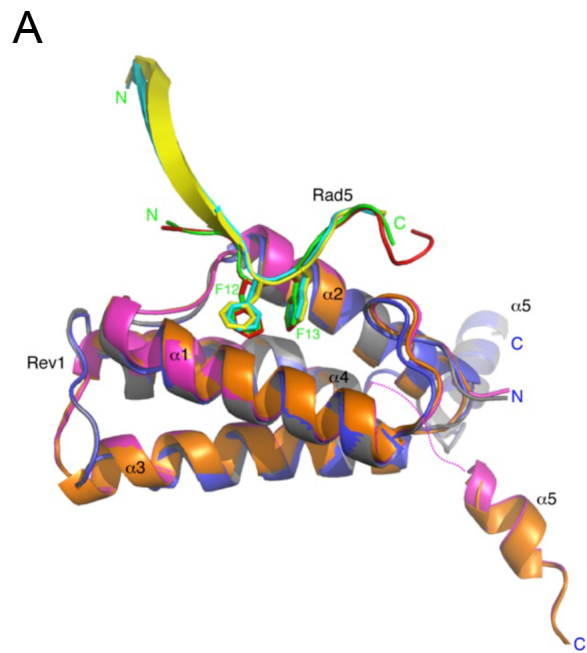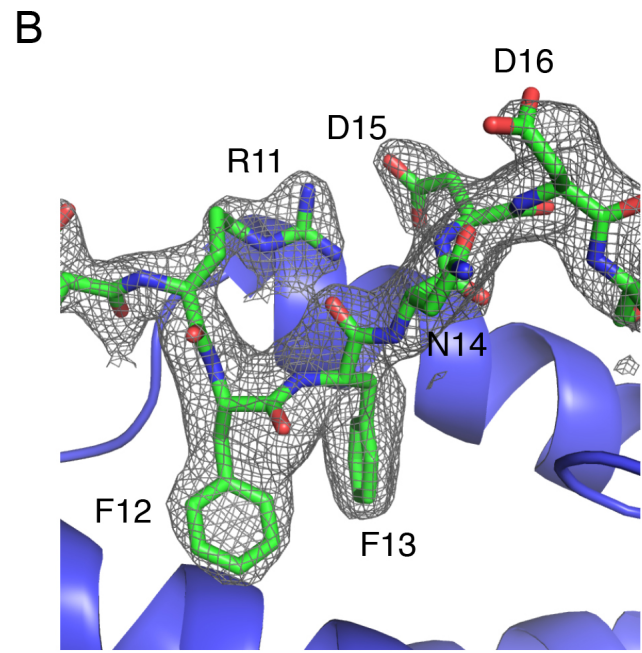

Figure S3



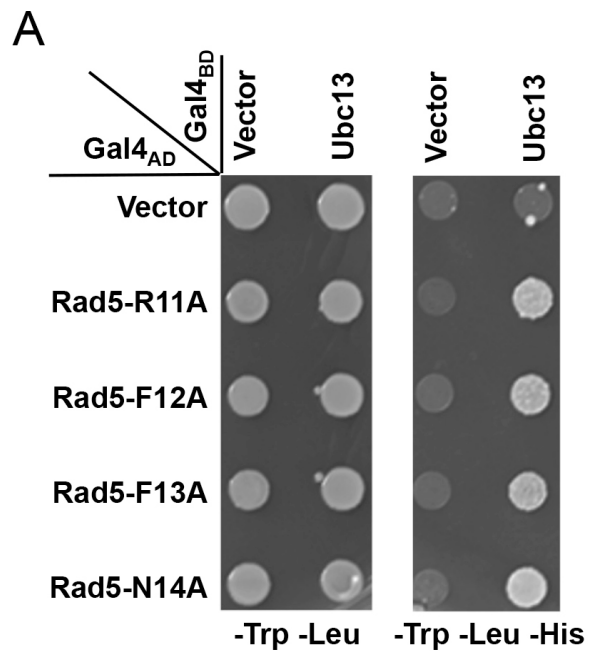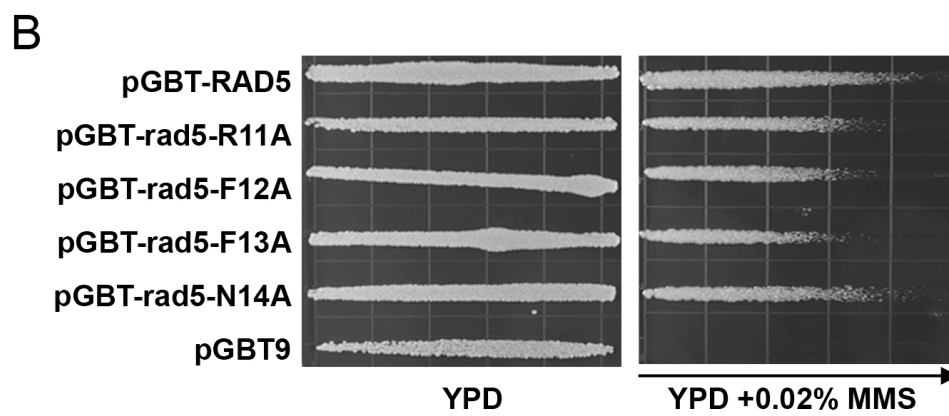

Figure S4

**A**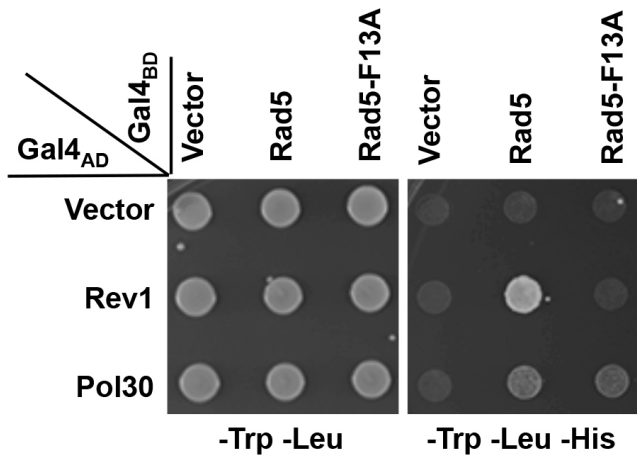**B**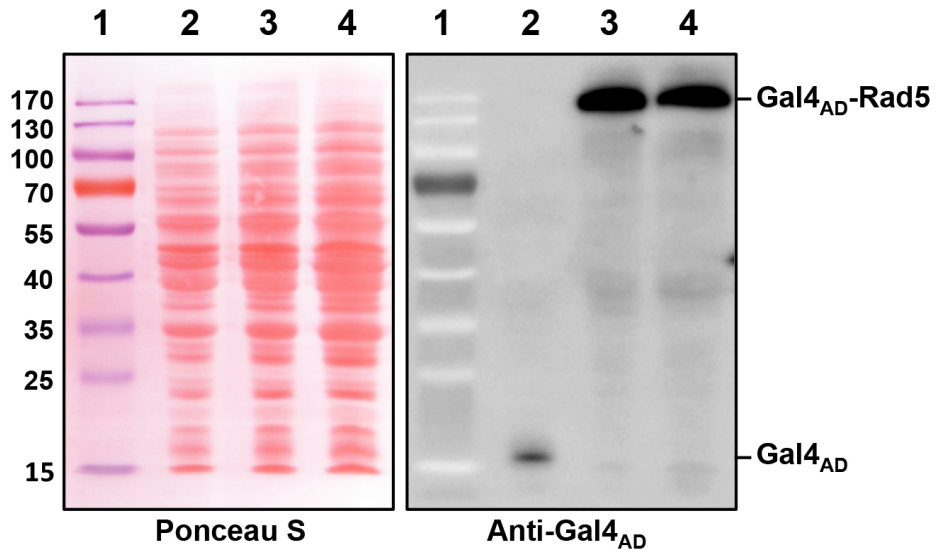

Figure S5
